# Supplementary material for: A role of inflammaging in aortic aneurysm: new insights from bioinformatics analysis
Source: PubMed Central journal article supplement (PMC10511768; doi:10.3389/fimmu.2023.1260688), 2023-09-06
Supplement: DataSheet_1.pdf [file DataSheet_1.pdf]

## Supplementary Figures

|                                                                                                                       |   |
|-----------------------------------------------------------------------------------------------------------------------|---|
| <b>Figure S1:</b> Clustering dendrogram of GSE140947 and GSE7084 datasets in WGCNA analysis.....                      | 1 |
| <b>Figure S2:</b> Identifying the soft threshold power in WGCNA analysis. ....                                        | 2 |
| <b>Figure S3:</b> The overlapping genes between aging and inflammation, considered as inflammaging-related genes..... | 3 |

# Supplementary Figure S1

**A**

Sample clustering to detect outliers (GSE140947)

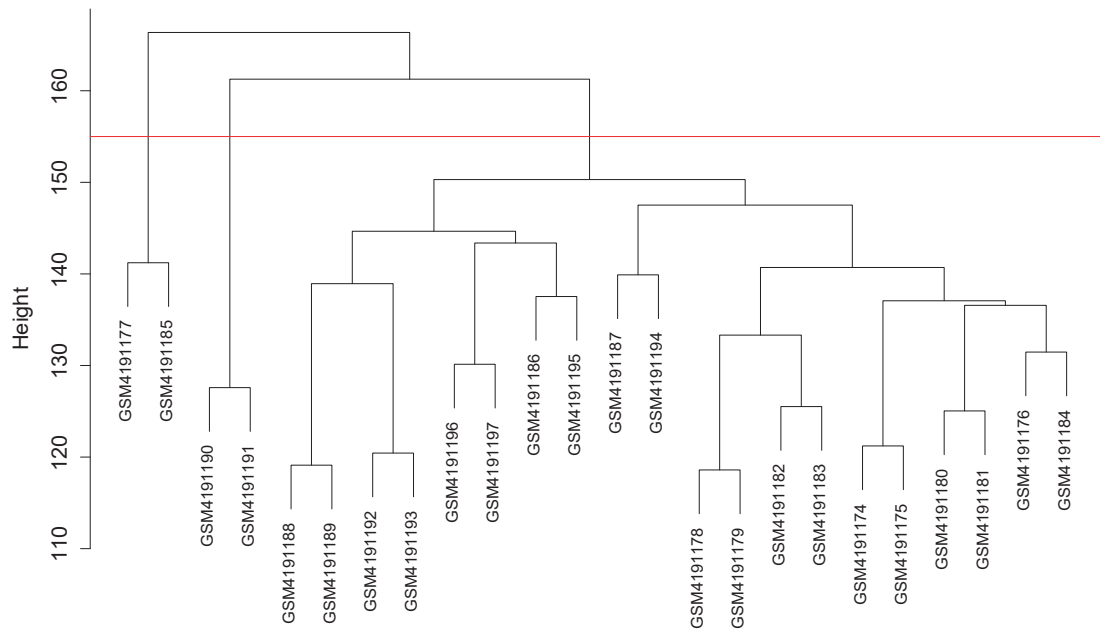

**B**

Sample clustering to detect outliers (GSE7084)

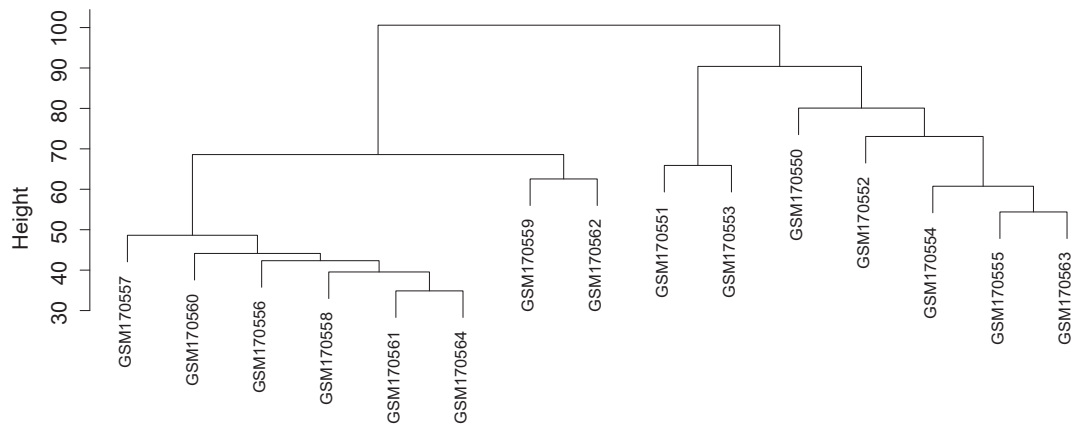

**Figure S1:** Clustering dendrogram of GSE140947 and GSE7084 datasets in WGCNA analysis. **(A)** GSE140947 dataset; **(B)** GSE7048 dataset.

## Supplementary Figure S2

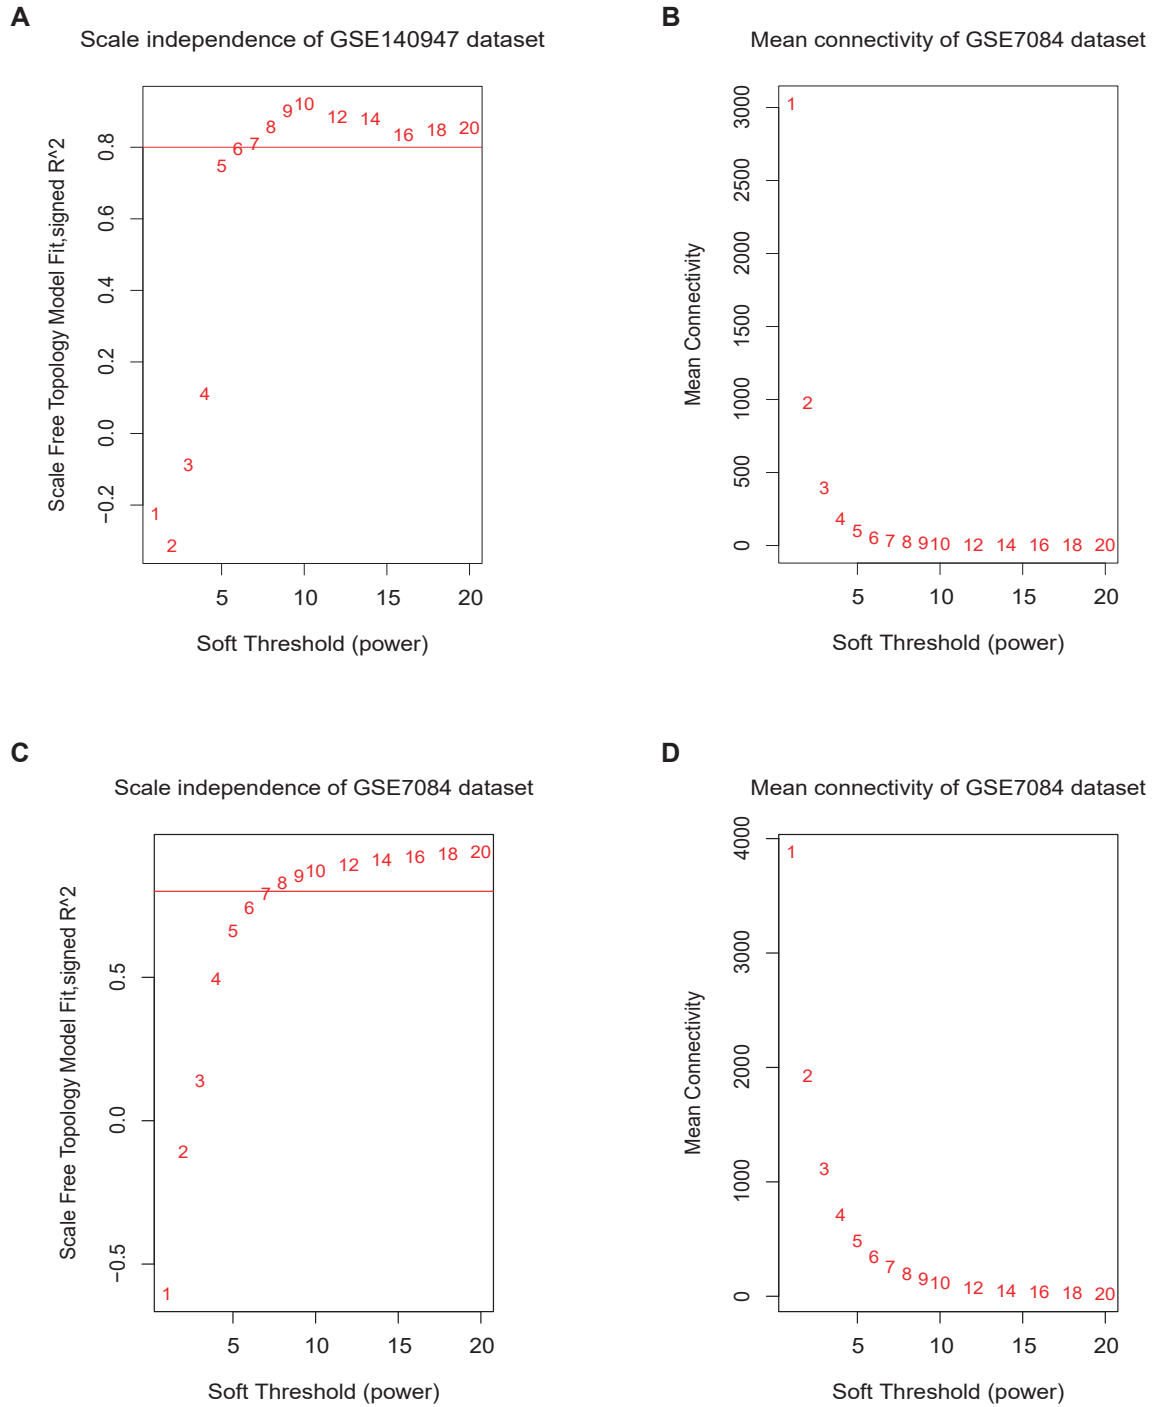

**Figure S2:** Identifying the soft threshold power in WGCNA analysis. The approximate scale-free fit index is achieved at the soft threshold power of 7 for both GSE140947 (**A,B**) and GSE7084 (**C,D**) datasets.

### Supplementary Figure S3

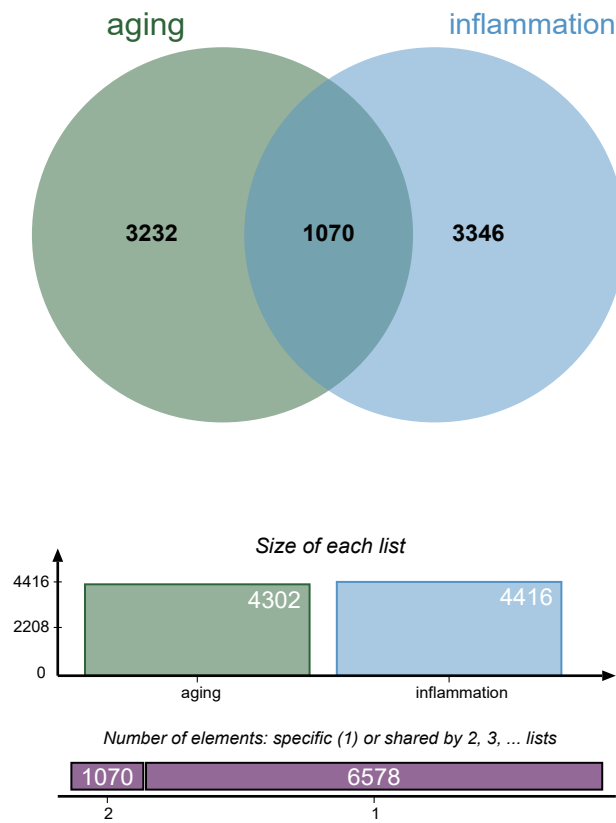

**Figure S3:** The overlapping genes between aging and inflammation, considered as inflammaging-related genes.
